# Supplementary material for: Comprehensive design considerations for a new hospital gown: a patient-oriented qualitative study
Source: PubMed Central journal article supplement — CMAJ Open. 2022 Dec 20;10(4):E1079–87. doi: 10.9778/cmajo.20210271 (PMC9771475; doi:10.9778/cmajo.20210271), 2022-12-20
Supplement: open-2021-0271-1-at.pdf [file open-2021-0271-1-at.pdf]

## Appendix 1: Interview Guide

### **Patient and Patient Family Members:**

#### **1) Can you tell me a bit about yourself in the context of a healthcare setting?**

Probe: What is your occupation? How long was your hospital stay as a patient? What unit in the hospital did you stay in?

#### **2) How does the current hospital patient gown make you feel?**

Probes: Why does the gown make you feel this way? What about the gown makes you feel this way? Can you talk about any social/ psychological impacts of the gown? Can you give me an example of why and when that was an issue? Can you think of a time when the patient gown made you feel good or bad?

#### **3) Tell me about your experiences and or the experiences of a loved one with the hospital patient gown during a hospital stay.**

Probes: If a bad experience, what was negative about it? If positive what was great about it? How important of a concern or benefit is this for you?

#### **4) What works about the current gown?**

Probes: How would you feel if this was changed about the gown?

#### **5) What are some of your complaints about current hospital gown?**

Probes: Why are these concerns?

#### **6) Do you have any safety concerns about the hospital gown?**

Probes: elderly patients, mental health patients using gown for self-harm?

#### **7) What do you think about the current hospital gown design?**

Probes: Are there any features of the current gown that can be improved? Neck opening? Fasteners? Ties? Coverage? Colours? Size? Material? Mobility? Sleeve length? Access? Safety concerns? Aesthetics? The ease of putting the gown on and taking it off? Sanitation?

#### **8) If a new gown was created, what are the most important features of a hospital gown for you? (e.g., material, access, coverage, cost).**

Probes: why are these features important to you?

## **Multi-disciplinary Clinicians:**

### **1) Can you tell me a bit about yourself in the context of healthcare?**

Probe: What do you do for work? How long have you been working at the hospital for? How much of your work entails interacting with patients?

### **2) How does the current hospital patient gown make you feel?**

Probes: Why does the gown make you feel this way? What about the gown makes you feel this way? Can you talk about any social/ psychological impacts of the gown on your patients? And how does that make you feel? Can you give me an example of why and when that was an issue?

### **3) How do you interact with the current hospital gown?**

What parts of the gown are important to you in the context of your work? How does the current gown impact your line of work? Does the current gown pose any challenges?

### **4) Tell me about your experiences with the hospital gown in the context of your line of work.**

Probes: If bad experience, what was negative about it? If positive what was great about it? How important was this experience to you? Is there anything you would change about the event? How has the current gown impacted the health outcomes of your patients?

### **5) What works about the current gown in the context of work?**

Probes: How would you feel if these features were changed? How would this impact your line of work? Will this make it easier or harder?

### **6) What are some of the complaints you hear about the current hospital gown from patients/ colleagues/ employees?**

Probes: Why do you think these are concerns? What do you think about these complaints? How have these concerns impacted your patients? Impacted patient satisfaction? Impacted recovery? Impacted rehabilitation? Impacted safety?

### **7) What do you think about the hospital gown design specifically?**

Probes: Are there any features of the current gown that can be improved? Neck opening? Fasteners, ties? Coverage? Colours? Size? Material? Mobility? Sleeve length? Access? Safety concerns? Aesthetics? The ease of putting the gown on and taking it off? Comfort?

### **8) If a new gown was created, what do you think are the most important characteristics or features you would like the new gown to include?**

Probes: Why are these features important to you? How will this impact your work? Will this increase efficiency? What do you think about disposable gowns?

## **Secondary Stakeholders & Tertiary Stakeholders:**

### **1) Can you tell me a bit about yourself in the context of healthcare?**

Probes: What is your occupation? What company do you work for? How many years of experience do you have? How much of your work entails interacting with patients?

### **2) How does the current hospital patient gown make you feel? What do you think about the current hospital gown?**

Probes: Why does the gown make you feel this way? What about the gown makes you feel this way? Can you talk about any social/ psychological impacts of the gown on your patients? And how does that make you feel? Can you give me an example of why and when that was an issue?

### **3) Can you explain your occupation's involvement with the gown from beginning to end?**

What parts of the gown are important to you in the context of your work? How does the current gown impact your line of work? What are the processes that the gown undergoes in your line of work? Does the current gown pose any challenges?

### **4) Tell me about your experiences with the hospital gown in the context of your line of work.**

Probes: If bad experience, what was negative about it? If positive what was great about it? How important was this experience to you? Is there anything you would change about the event? How has the current gown impacted the health outcomes of patients?

### **5) What works about the current gown in the context of your line of work?**

Probes: How would you feel if this was changed about the gown? How would this impact your line of work? Will this make it easier or harder?

### **6) What are some of your or your colleague's complaints of the current hospital gown?**

Probes: Why do you think these are concerns? What do you think about these complaints? How have these concerns impacted your patients? Impacted patient satisfaction? Impacted recovery? Impacted rehabilitation? Impact on safety?

### **7) What do you think about the hospital gown design specifically?**

Probes: Are there any features of the current gown that can be improved? Neck opening? Fasteners, ties? Coverage? Colours? Size? Material? Mobility? Sleeve length? Access? Safety concerns? Aesthetics? The ease of putting the gown on and taking it off? Comfort?

### **8) If a new gown was created, what are the most important characteristics or features you would like the new gown to include?**

Probes: Why are these features important to you? How will this impact your work? Will this increase efficiency? Benefits versus disadvantages of potential specific features, such as pockets and novel fasteners or ties.

**9) What do you think a new gown would do to patient satisfaction at the hospital?  
(leadership question)**

Probes: Health outcomes? Rehabilitation? Empowerment?

**10) Can you tell me more about the cost of the current gown?**

Probes: Environmental costs? Economic costs? Laundering costs?

**11) What can be done to reduce costs?**

Probes: Change in fabric? Change in features such as fasteners, ties?
