# Supplementary material for: Comprehensive design considerations for a new hospital gown: a patient-oriented qualitative study
Source: PubMed Central journal article supplement — CMAJ Open. 2022 Dec 20;10(4):E1079–87. doi: 10.9778/cmajo.20210271 (PMC9771475; doi:10.9778/cmajo.20210271), 2022-12-20
Supplement: open-2021-0271-coreq-checklist.pdf [file open-2021-0271-coreq-checklist.pdf]

### Supplemental File: COREQ 32-item checklist

Adapted from: Tong A, Sainsbury P, Craig J. Consolidated criteria for reporting qualitative research (COREQ): a 32-item checklist for interviews and focus groups. *International Journal for Quality in Health Care*. 2007;19(6):349-357.

| No. Item                                       | Questions/Description                                                                                    | Reported Section and/or Additional Details (if applicable)                                                                                                |
|------------------------------------------------|----------------------------------------------------------------------------------------------------------|-----------------------------------------------------------------------------------------------------------------------------------------------------------|
| <b>Domain 1: Research team and reflexivity</b> |                                                                                                          |                                                                                                                                                           |
| Personal Characteristics                       |                                                                                                          |                                                                                                                                                           |
| 1. Interviewer/facilitator                     | Which author/s conducted the interview or focus group?                                                   | See Methods                                                                                                                                               |
| 2. Credentials                                 | What were the researcher's credentials? E.g., PhD, MD                                                    | Author 1: BSc, MBA, MD.<br>Author 2: BKin, DC, MSc, PhD.<br>Author 3: BSc, MSc.<br>Author 4: Patient Lead.<br>Author 5: MFA.<br>Author 6: MD, MPA, FRCPC. |
| 3. Occupation                                  | What was their occupation at the time of the study?                                                      | See Methods                                                                                                                                               |
| 4. Gender                                      | Was the researcher male or female?                                                                       | Author 1: Male<br>Author 2: Male<br>Author 3: Male<br>Author 4: Female<br>Author 5: Male<br>Author 6: Male                                                |
| 5. Experience and training                     | What experience or training did the researcher have?                                                     | See Methods                                                                                                                                               |
| Relationship with participants                 |                                                                                                          |                                                                                                                                                           |
| 6. Relationship established                    | Was a relationship established prior to study commencement?                                              | Some participants were in the same professional circles as the researchers.                                                                               |
| 7. Participant knowledge of the interviewer    | What did the participants know about the researcher? e.g. personal goals, reasons for doing the research | See Methods                                                                                                                                               |

|                                          |                                                                                                                                                          |                     |
|------------------------------------------|----------------------------------------------------------------------------------------------------------------------------------------------------------|---------------------|
| 8. Interviewer characteristics           | What characteristics were reported about the interviewer/facilitator? e.g. Bias, assumptions, reasons and interests in the research topic                | See Methods         |
| <b>Domain 2: study design</b>            |                                                                                                                                                          |                     |
| Theoretical framework                    |                                                                                                                                                          |                     |
| 9. Methodological orientation and Theory | What methodological orientation was stated to underpin the study? e.g. grounded theory, discourse analysis, ethnography, phenomenology, content analysis | See Methods         |
| Participant selection                    |                                                                                                                                                          |                     |
| 10. Sampling                             | How were participants selected? e.g. purposive, convenience, consecutive, snowball                                                                       | See Methods         |
| 11. Method of approach                   | How were participants approached? e.g. face-to-face, telephone, mail, email                                                                              | See Methods         |
| 12. Sample size                          | How many participants were in the study?                                                                                                                 | See Results         |
| 13. Non-participation                    | How many people refused to participate or dropped out? Reasons?                                                                                          | See Results         |
| Setting                                  |                                                                                                                                                          |                     |
| 14. Setting of data collection           | Where was the data collected? e.g. home, clinic, workplace                                                                                               | See Methods         |
| 15. Presence of non-participants         | Was anyone else present besides the participants and researchers?                                                                                        | See Methods/Results |
| 16. Description of sample                | What are the important characteristics of the sample? e.g. demographic data, date                                                                        | See Results         |
| Data collection                          |                                                                                                                                                          |                     |
| 17. Interview guide                      | Were questions, prompts, guides provided by the authors? Was it pilot tested?                                                                            | See Methods.        |
| 18. Repeat interviews                    | Were repeat interviews carried out? If yes, how many?                                                                                                    | N/A                 |
| 19. Audio/visual recording               | Did the research use audio or visual recording to collect the data?                                                                                      | See Methods         |
| 20. Field notes                          | Were field notes made during and/or after the interview or focus group?                                                                                  | See Methods         |
| 21. Duration                             | What was the duration of the interviews or focus group?                                                                                                  | See Results         |
| 22. Data saturation                      | Was data saturation discussed?                                                                                                                           | See Methods/Results |
| 23. Transcripts returned                 | Were transcripts returned to                                                                                                                             | See Methods         |

|                                        |                                                                                                                                 |                        |
|----------------------------------------|---------------------------------------------------------------------------------------------------------------------------------|------------------------|
|                                        | participants for comment and/or correction?                                                                                     |                        |
| <b>Domain 3: analysis and findings</b> |                                                                                                                                 |                        |
| Data analysis                          |                                                                                                                                 |                        |
| 24. Number of data coders              | How many data coders coded the data?                                                                                            | See Methods            |
| 25. Description of the coding tree     | Did authors provide a description of the coding tree?                                                                           | N/A                    |
| 26. Derivation of themes               | Were themes identified in advance or derived from the data?                                                                     | See Methods            |
| 27. Software                           | What software, if applicable, was used to manage the data?                                                                      | See Methods            |
| 28. Participant checking               | Did participants provide feedback on the findings?                                                                              | See Results            |
| Reporting                              |                                                                                                                                 |                        |
| 29. Quotations presented               | Were participant quotations presented to illustrate the themes/findings? Was each quotation identified? e.g. participant number | See Results            |
| 30. Data and findings consistent       | Was there consistency between the data presented and the findings?                                                              |                        |
| 31. Clarity of major themes            | Were major themes clearly presented in the findings?                                                                            |                        |
| 32. Clarity of minor themes            | Is there a description of diverse cases or discussion of minor themes?                                                          | See Results/Discussion |
