# Supplementary material for: Comprehensive design considerations for a new hospital gown: a patient-oriented qualitative study
Source: PubMed Central journal article supplement — CMAJ Open. 2022 Dec 20;10(4):E1079–87. doi: 10.9778/cmajo.20210271 (PMC9771475; doi:10.9778/cmajo.20210271), 2022-12-20
Supplement: open-2021-0271-gripp-checklist.pdf [file open-2021-0271-gripp-checklist.pdf]

### Supplemental File: GRIPP2 Form Short Checklist

Adapted from: Staniszewska S, Brett J, Simera I, Seers K, Mockford C, Goodlad S, et al. GRIPP2 reporting checklists: tools to improve reporting of patient and public involvement in research. *BMJ*. 2017;358:j3453

| <b>Section and topic</b>         | <b>Item</b>                                                                                                                                | <b>Reported section</b> |
|----------------------------------|--------------------------------------------------------------------------------------------------------------------------------------------|-------------------------|
| Aim                              | Report the aim of PPI (patient and public involvement) in the study.                                                                       | Methods                 |
| Methods                          | Provide a clear description of the methods used for PPI in the study.                                                                      | Methods                 |
| Study results                    | Outcomes—Report the results of PPI in the study, including both positive and negative outcomes.                                            | Interpretation          |
| Discussion and conclusion        | Outcomes—Comment on the extent to which PPI influenced the study overall. Describe positive and negative effects.                          | Methods, Interpretation |
| Reflections/critical perspective | Comment critically on the study, reflecting on the things that went well and those that did not, so others can learn from this experience. | Interpretation          |
